# Supplementary material for: Janus-type ionic conductive gels with single-sided adhesiveness prepared by a “one-step” method for strain/pressure sensors
Source: Royal Society of Chemistry journal article supplement (doi:10.1039/d3tc00933e), 2023-01-01
Supplement: d3tc00933e5.pdf [file d3tc00933e5.pdf]

## 1. Supplementary Tables

Table S1. A comparison of the performance of sensors based on Janus gels

| No. | Janus gels                      | Preparation                          | GF                                                          | DH    | Cycle stability | Ref.      |
|-----|---------------------------------|--------------------------------------|-------------------------------------------------------------|-------|-----------------|-----------|
| 1   | PDMA/RSF                        | One-step in situ photopolymerization | GF = 2.24 (strain);<br>0.00732 kPa <sup>-1</sup> (pressure) | 4.92% | 500             | This work |
| 2   | PVA/PANI;<br>PVA/PA             | Freeze–thaw cycle                    | GF = 3.4 (strain);<br>NA (pressure)                         | NA    | 1000            | 1         |
| 3   | J-AuNPs@GA                      | Medium-guided diffusion              | GF = 0.3 (strain);<br>NA (pressure)                         | NA    | NA              | 2         |
| 4   | SMA/CNFs/PA<br>M;NFs@TA/P<br>AA | Layer-by-layer polymerization        | GF = 0.3(strain);<br>NA (pressure)                          | NA    | 200             | 3         |
| 5   | PAAM/SDS/H<br>MA;PAAM/Aa<br>/Ta | Layer-by-layer polymerization        | NA                                                          | NA    | NA              | 4         |
| 6   | PAA/Lignin/Ca<br>2 <sup>+</sup> | Impregnation diffusion               | GF = 2.51(strain);<br>NA (pressure)                         | NA    | NA              | 5         |

Table S2. Formula of PDMA-RSF ion-conductive gels

| Ion-conductive gel | DMA (g) | [EMIM][Tf <sub>2</sub> N] (g) | 1173 (g) | PEGDA (g) | 7.2wt%RSF (g) |
|--------------------|---------|-------------------------------|----------|-----------|---------------|
| PDMA-RSF(0.5wt%)   | 0.8     | 1.2                           | 0.008    | 0.002     | 0.056         |
| PDMA-RSF(1wt%)     | 0.8     | 1.2                           | 0.008    | 0.002     | 0.111         |
| PDMA-RSF(2wt%)     | 0.8     | 1.2                           | 0.008    | 0.002     | 0.222         |
| PDMA-RSF(3wt%)     | 0.8     | 1.2                           | 0.008    | 0.002     | 0.333         |
| PDMA-RSF(5wt%)     | 0.8     | 1.2                           | 0.008    | 0.002     | 0.556         |

Table S3. Mechanical properties and adhesion strength of the Janus gels

| No. | Janus gels          | Preparation                          | Stress (kPa) | Strain (%) | Adhesion strength (kPa) | Ref.      |
|-----|---------------------|--------------------------------------|--------------|------------|-------------------------|-----------|
| 1   | PDMA/RSF            | One-step in situ photopolymerization | 215.90       | 2671%      | 250                     | This work |
| 2   | PVA/PANI;<br>PVA/PA | Freeze-thaw cycle                    | 45.8         | 345.3%     | 1.6                     | 1         |
| 3   | ADSCH               | Layer-by-layer polymerization        | 150          | 800        | 30                      | 6         |

## 2. Supplementary Figures

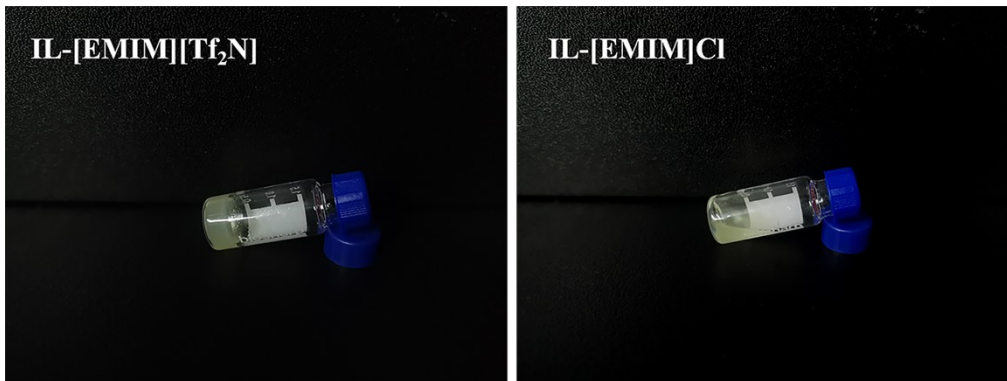

Fig. S1. Digital photograph of ionic conductive gel prepared using [EMIM][Tf<sub>2</sub>N] and [EMIM]Cl, respectively.

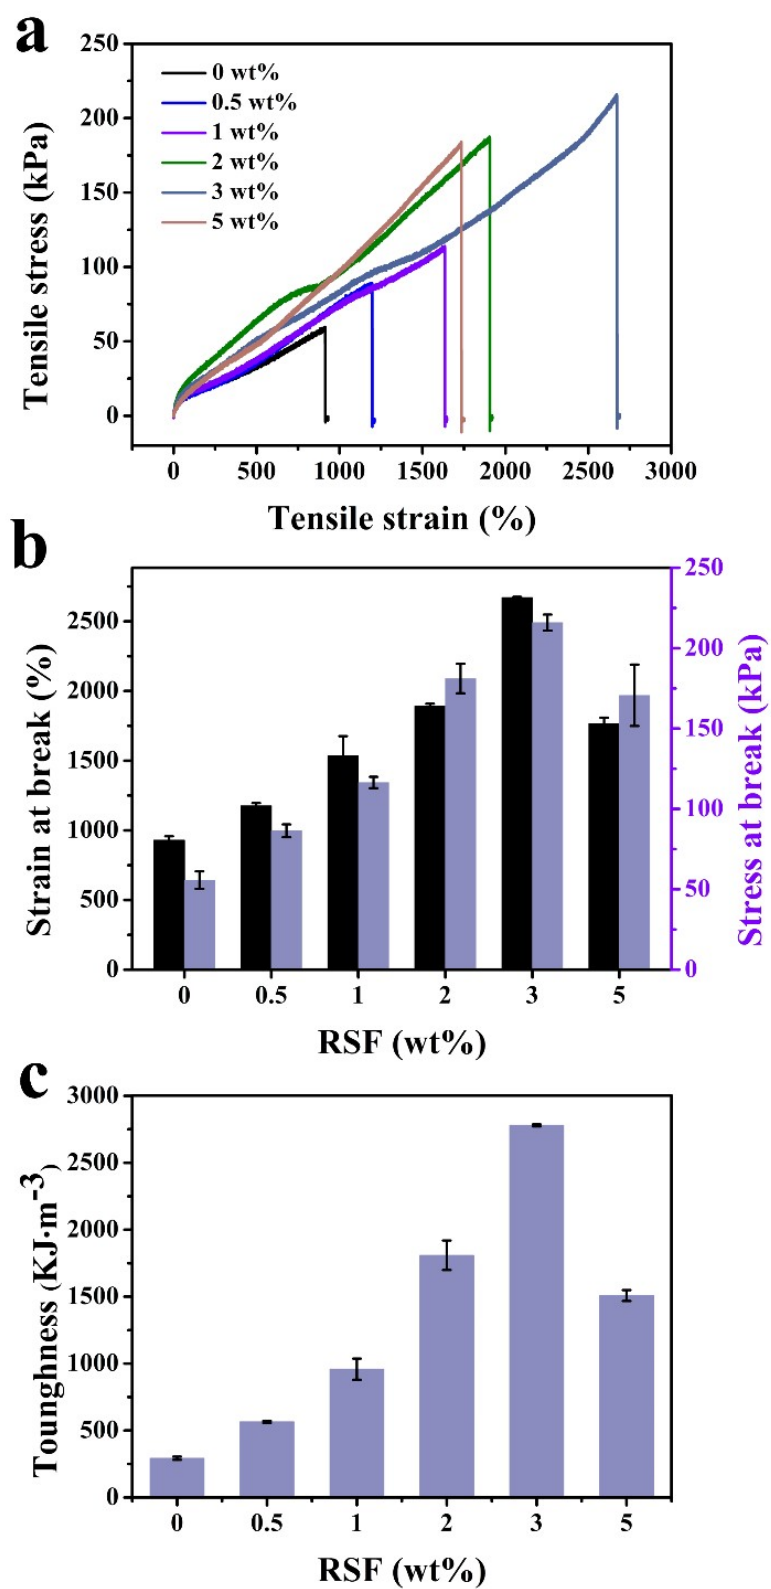

Fig. S2. (a) Tensile testing stress–strain curves, (b) stress at break and strain at break, and (c) toughness of the PDMA-RSF ion-conductive gels with various RSF contents.

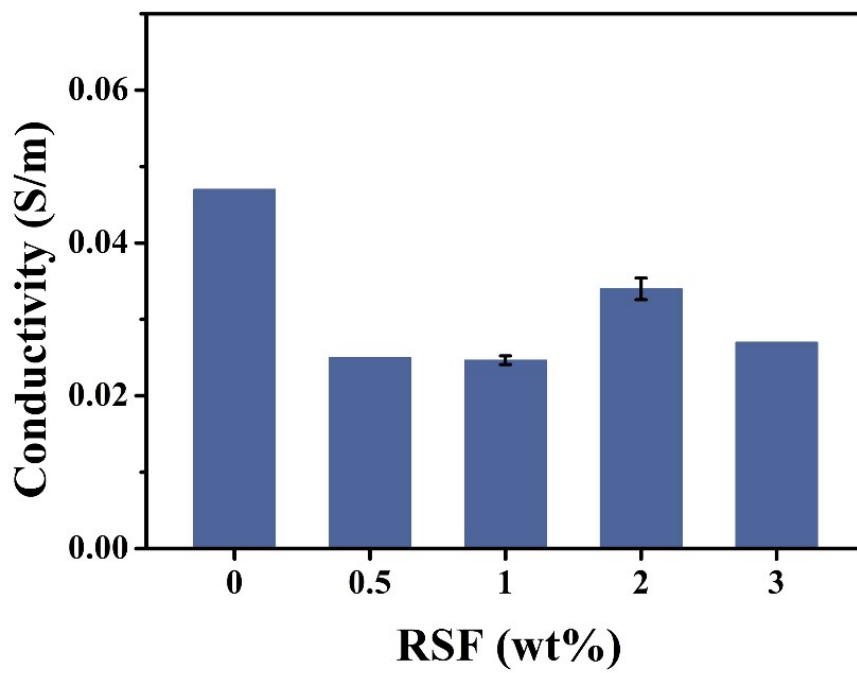

Fig. S3. Conductivity of PDMA-RSF ion-conductive gels with different RSF contents.

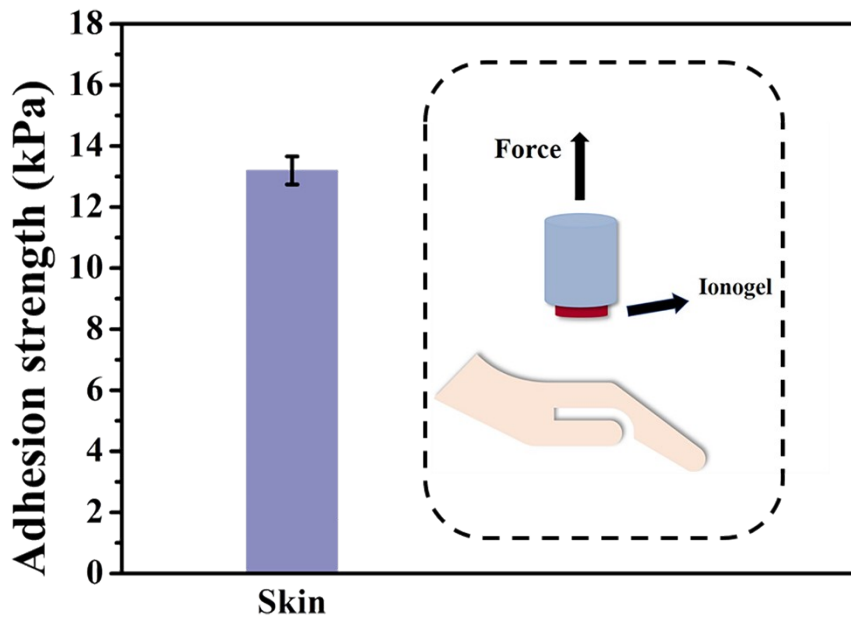

Fig. S4. Adhesion strength of PDMA-RSF ionic conductive gels to the skin.

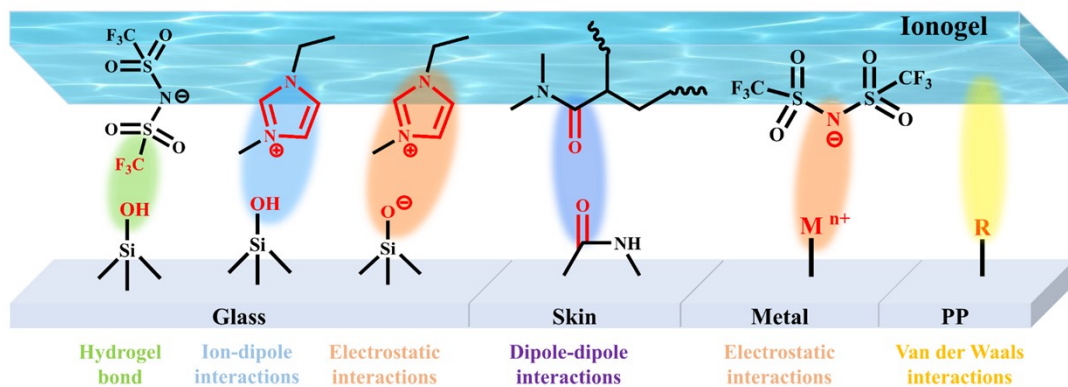

Fig. S5. Possible adhesion mechanism of PDMA-RSF ion-conductive gels on different substrate surfaces.

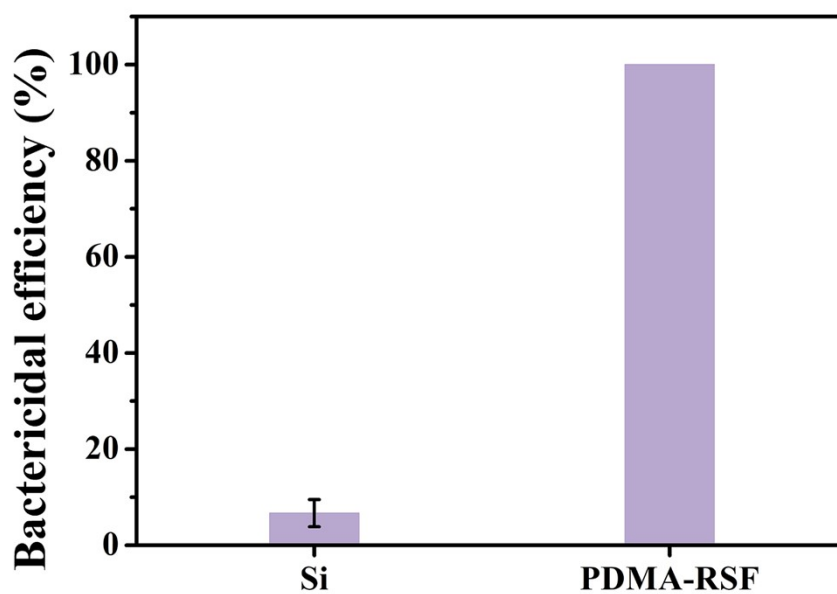

Fig. S6. Bactericidal efficiency of silicon wafers and PDMA-RSF ion-conductive gels.

## References

- 1 M. C. Wang, H. W. Zhou, H. T. Du, L. Chen, G. X. Zhao, H. B. Liu, X. L. Jin, W. X. Chen and A. J. Ma, *Chem. Eng. J.*, 2022, **446**, 137163.
- 2 X. Zhang, Y. Zhang, W. Zhang, Y. Dai and F. Xia, *Chem. Eng. J.*, 2021, **420**, 130447.
- 3 X. Qu, S. Wang, Y. Zhao, H. Huang, Q. Wang, J. Shao, W. Wang and X. Dong, *Chem. Eng. J.*, 2021, **425**, 131523.
- 4 Q. Zhang, X. Liu, L. Duan and G. Gao, *Chem. Eng. J.*, 2019, **365**, 10-19.
- 5 C. Fu, J. Lin, Z. Tang, L. Chen, F. Huang, F. Kong, Y. Ni and L. Huang, *Int. J. Biol. Macromol.*, 2022, **201**, 104-110.
- 6 L. Bai, Y. Jin, X. Shang, L. Shi, H. Jin, R. Zhou and S. Lai, *Chem. Eng. J.*, 2022, **438**, 135596.
